# Supplementary material for: 3D Spheroid Cultivation Alters the Extent and Progression of Osteogenic Differentiation of Mesenchymal Stem/Stromal Cells Compared to 2D Cultivation
Source: MDPI journal article supplement (doi:10.3390/biomedicines11041049), 2023-03-29
Supplement: s1 [file s1]

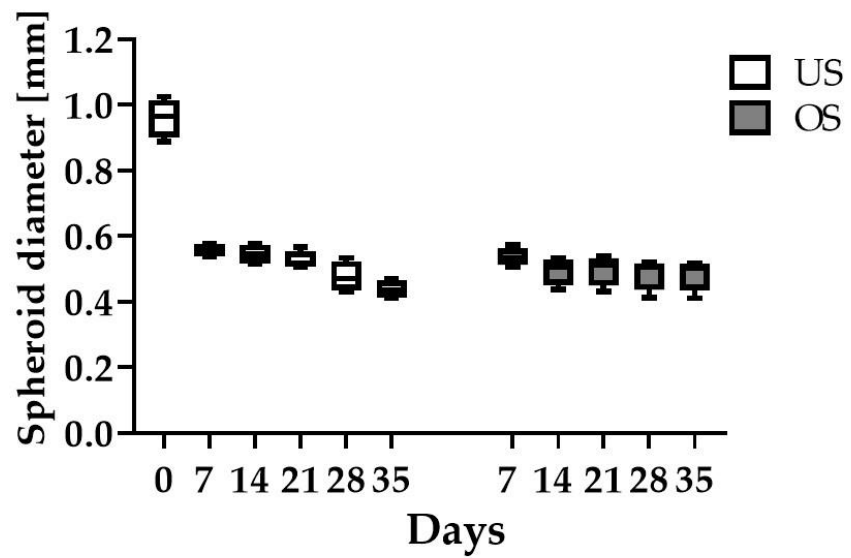

**Figure S1.** Analysis of the spheroid diameter of unstimulated (US) and osteogenically stimulated (OS) spheroids at day 0, and after 7, 14, 21, 28 and 35 days of cultivation (image analysis performed with ImageJ, n = 4).

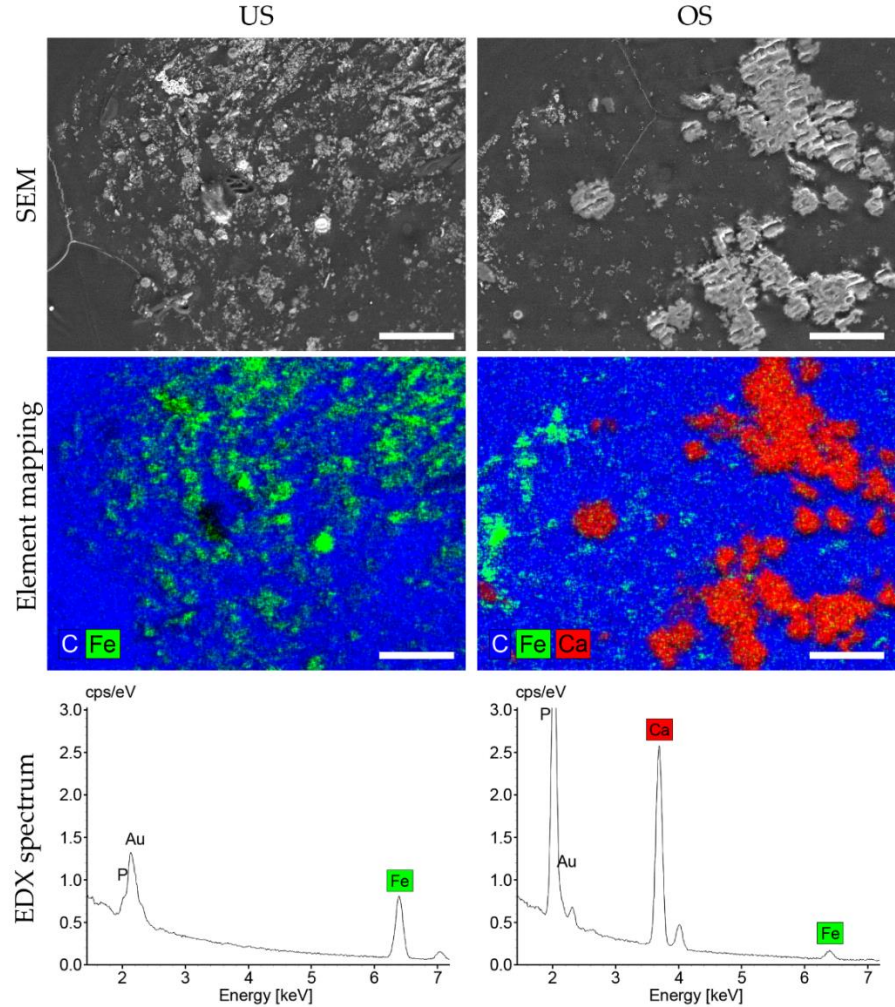

**Figure S2.** SEM-EDX analysis of unstimulated and osteogenically stimulated adMSC in 3D spheroid culture after 28 days. ‘Block-face’ imaging of the embedded unstimulated spheroids (US) or osteogenically stimulated spheroids (OS) was performed after histological sections were prepared. Imaging with secondary electron detection outlines structural features of the samples, i.e. metal particles and deposited calcified matrix, which are displayed as brighter areas (top panel). In combination with X-ray spectroscopy an elemental map is generated by assigning a color coding that shows iron (green) and calcium (red) embedded in a carbon containing matrix (blue), representing spheroid cells and resin (middle panel). The spectra obtained during the mapping (acquisition time 6 min) show that considerable amounts of calcium and phosphorus are exclusively found in the OS condition, indicating substantial matrix deposition of calcium-phosphate. Note that larger agglomerations of calcium containing matrix deposits tend to be formed by merging of individual spots compared to the condition at 14 days of culture (see Figure 6) (scale bars: 30  $\mu\text{m}$ ).

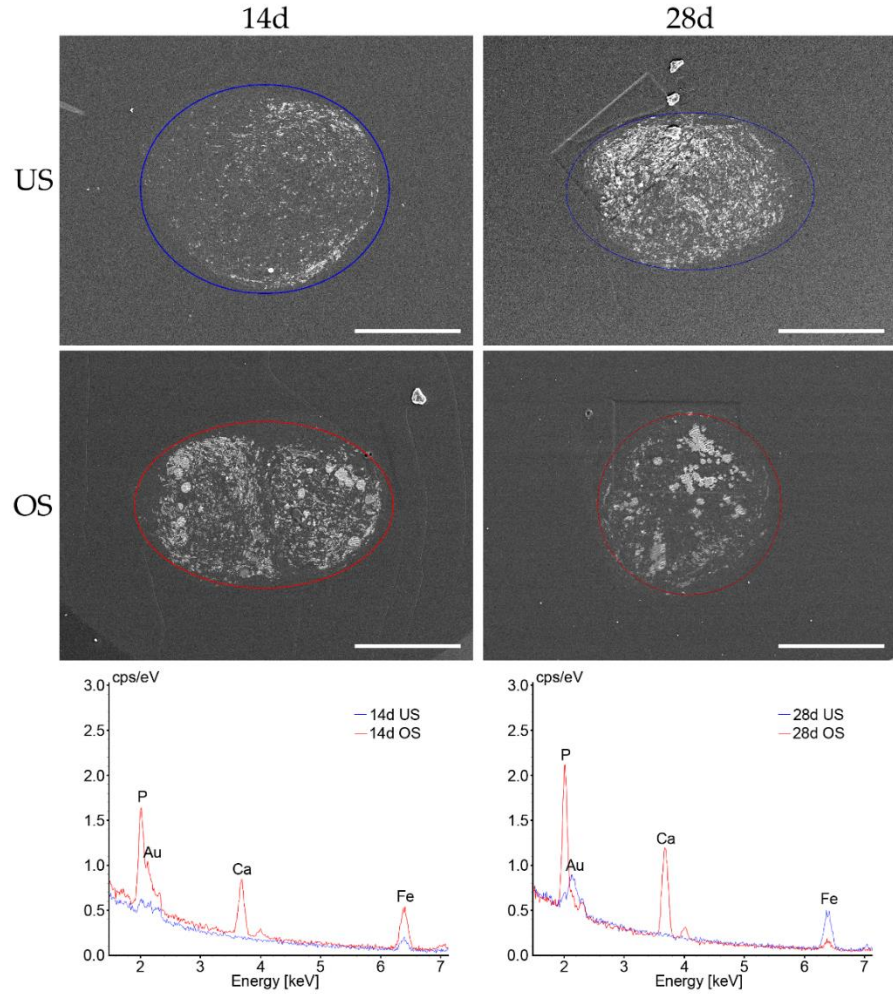

**Figure S3.** SEM-EDX spectrum analysis of unstimulated and osteogenically stimulated adMSC in 3D spheroid cultures after 14 and 28 days of cultivation. Spectrum recordings were obtained from the polished surfaces of the embedded spheroid blocks after cutting of the histological sections, a so-called ‘block-face’ condition. Characteristic element specific X-rays were detected across the total surface area of the respective unstimulated spheroids (US), encircled in blue color (top panel) or of osteogenic stimulated spheroids (OS) encircled in red color (middle panel) for a total of  $3 \times 10^5$  counts using a 30  $\mu\text{m}$  aperture and 12 kV acceleration voltage. The overlay of the resulting spectra clearly demonstrates that peaks identifying calcium and phosphorus are limited to the osteogenic conditions (red spectra) and are virtually absent from the unstimulated conditions (blue spectra) at both time points (bottom panel) (scale bars: 200  $\mu\text{m}$ ).

**Table S1.** Quantification of bone metabolism-affecting factors in cell culture supernatants and lysates from unstimulated (US) and osteogenic (OS) stimulated 2D and 3D cultures (multiplex assay, biological replicates: n = 4, technical replicates were involved in the calculations, represented as median and the respective minimum (Min) and maximum (Max) value, in pg/10<sup>4</sup> cells, in descending order depending on the amount detected, with decimal place in the single digit range).

| Analyte | Supernatant |    |         |        |         |        |      |       | Lysate |     |      |        |     |     |
|---------|-------------|----|---------|--------|---------|--------|------|-------|--------|-----|------|--------|-----|-----|
|         |             |    | 2D      |        |         | 3D     |      |       | 2D     |     |      | 3D     |     |     |
|         |             |    | Median  | Min    | Max     | Median | Min  | Max   | Median | Min | Max  | Median | Min | Max |
| DKK1    | Day 7       | US | 164301  | 85757  | 307129  | 214    | 170  | 400   | 182    | 5,3 | 198  | 4,4    | 2   | 94  |
|         |             | OS | 2507609 | 825760 | 2722471 | 4665   | 2636 | 5781  | 490    | 56  | 773  | 22     | 16  | 351 |
|         | Day 28      | US | 920208  | 851199 | 1112361 | 4319   | 69   | 35934 | 112    | 95  | 135  | 14     | 1,9 | 43  |
|         |             | OS | 392085  | 284111 | 1032174 | 4215   | 1548 | 6250  | 299    | 145 | 417  | 25     | 14  | 38  |
| OPG     | Day 7       | US | 7532    | 6543   | 9860    | 25     | 13   | 28    | 120    | 1,6 | 239  | 17     | 1,3 | 94  |
|         |             | OS | 2415    | 2317   | 3745    | 6,2    | 5,4  | 9,3   | 48     | 2,2 | 79   | 3,5    | 0,4 | 33  |
|         | Day 28      | US | 4136    | 3004   | 7668    | 35     | 0,1  | 84    | 230    | 132 | 1298 | 6,6    | 1,4 | 12  |
|         |             | OS | 1046    | 653    | 8554    | 9,7    | 2,9  | 15    | 92     | 42  | 237  | 2,2    | 1,4 | 4,0 |
| IL6     | Day 7       | US | 6454    | 4504   | 9230    | 663    | 394  | 807   | 57     | 19  | 126  | 28     | 6,1 | 58  |
|         |             | OS | 1976    | 1071   | 3053    | 24     | 20   | 40    | 4,0    | 0   | 9,2  | 2,4    | 1,3 | 15  |
|         | Day 28      | US | 2617    | 2403   | 3955    | 760    | 143  | 5102  | 51     | 8,8 | 199  | 0      | 0   | 0   |
|         |             | OS | 419     | 224    | 2167    | 59     | 54   | 83    | 4,6    | 1,3 | 7,8  | 0,2    | 0   | 4,4 |
| SOST    | Day 7       | US | 1578    | 488    | 1879    | 0      | 0    | 0     | 0      | 0   | 0    | 0      | 0   | 0   |
|         |             | OS | 2148    | 2058   | 2435    | 0      | 0    | 0     | 0      | 0   | 0    | 0      | 0   | 0   |
|         | Day 28      | US | 574     | 546    | 1135    | 0      | 0    | 0     | 90     | 72  | 236  | 0      | 0   | 0   |
|         |             | OS | 472     | 394    | 1138    | 0      | 0    | 0     | 69     | 23  | 383  | 0      | 0   | 0   |
| Leptin  | Day 7       | US | 13      | 0      | 20      | 0      | 0    | 0     | 0      | 0   | 0    | 0      | 0   | 0   |
|         |             | OS | 691     | 672    | 1158    | 0      | 0    | 0     | 0      | 0   | 0    | 0      | 0   | 0   |
|         | Day 28      | US | 36      | 8,4    | 170     | 0      | 0    | 0     | 0      | 0   | 0    | 0      | 0   | 0   |
|         |             | OS | 1227    | 1029   | 3200    | 0      | 0    | 0     | 0      | 0   | 0    | 0      | 0   | 0   |
| OPN     | Day 7       | US | 57      | 53     | 146     | 0      | 0    | 54    | 0      | 0   | 0    | 0      | 0   | 0   |
|         |             | OS | 67      | 57     | 83      | 0      | 0    | 0     | 0      | 0   | 0    | 0      | 0   | 0   |
|         | Day 28      | US | 28      | 23     | 69      | 0      | 0    | 183   | 0      | 0   | 0    | 0      | 0   | 0   |
|         |             | OS | 17      | 7,6    | 49      | 0      | 0    | 65    | 0      | 0   | 0    | 0      | 0   | 0   |
| OC      | Day 7       | US | 42      | 0      | 119     | 0      | 0    | 26    | 0      | 0   | 0    | 0      | 0   | 0   |
